# Supplementary material for: Ideal Cardiovascular Health: Distribution, Determinants and Relationship with Health Status among People Living with HIV in Urban Tanzania
Source: PubMed Central journal article supplement (PMC9562968; doi:10.5334/gh.1157), 2022-10-12
Supplement: gh-17-1-1157-s1.pdf [file gh-17-1-1157-s1.pdf]

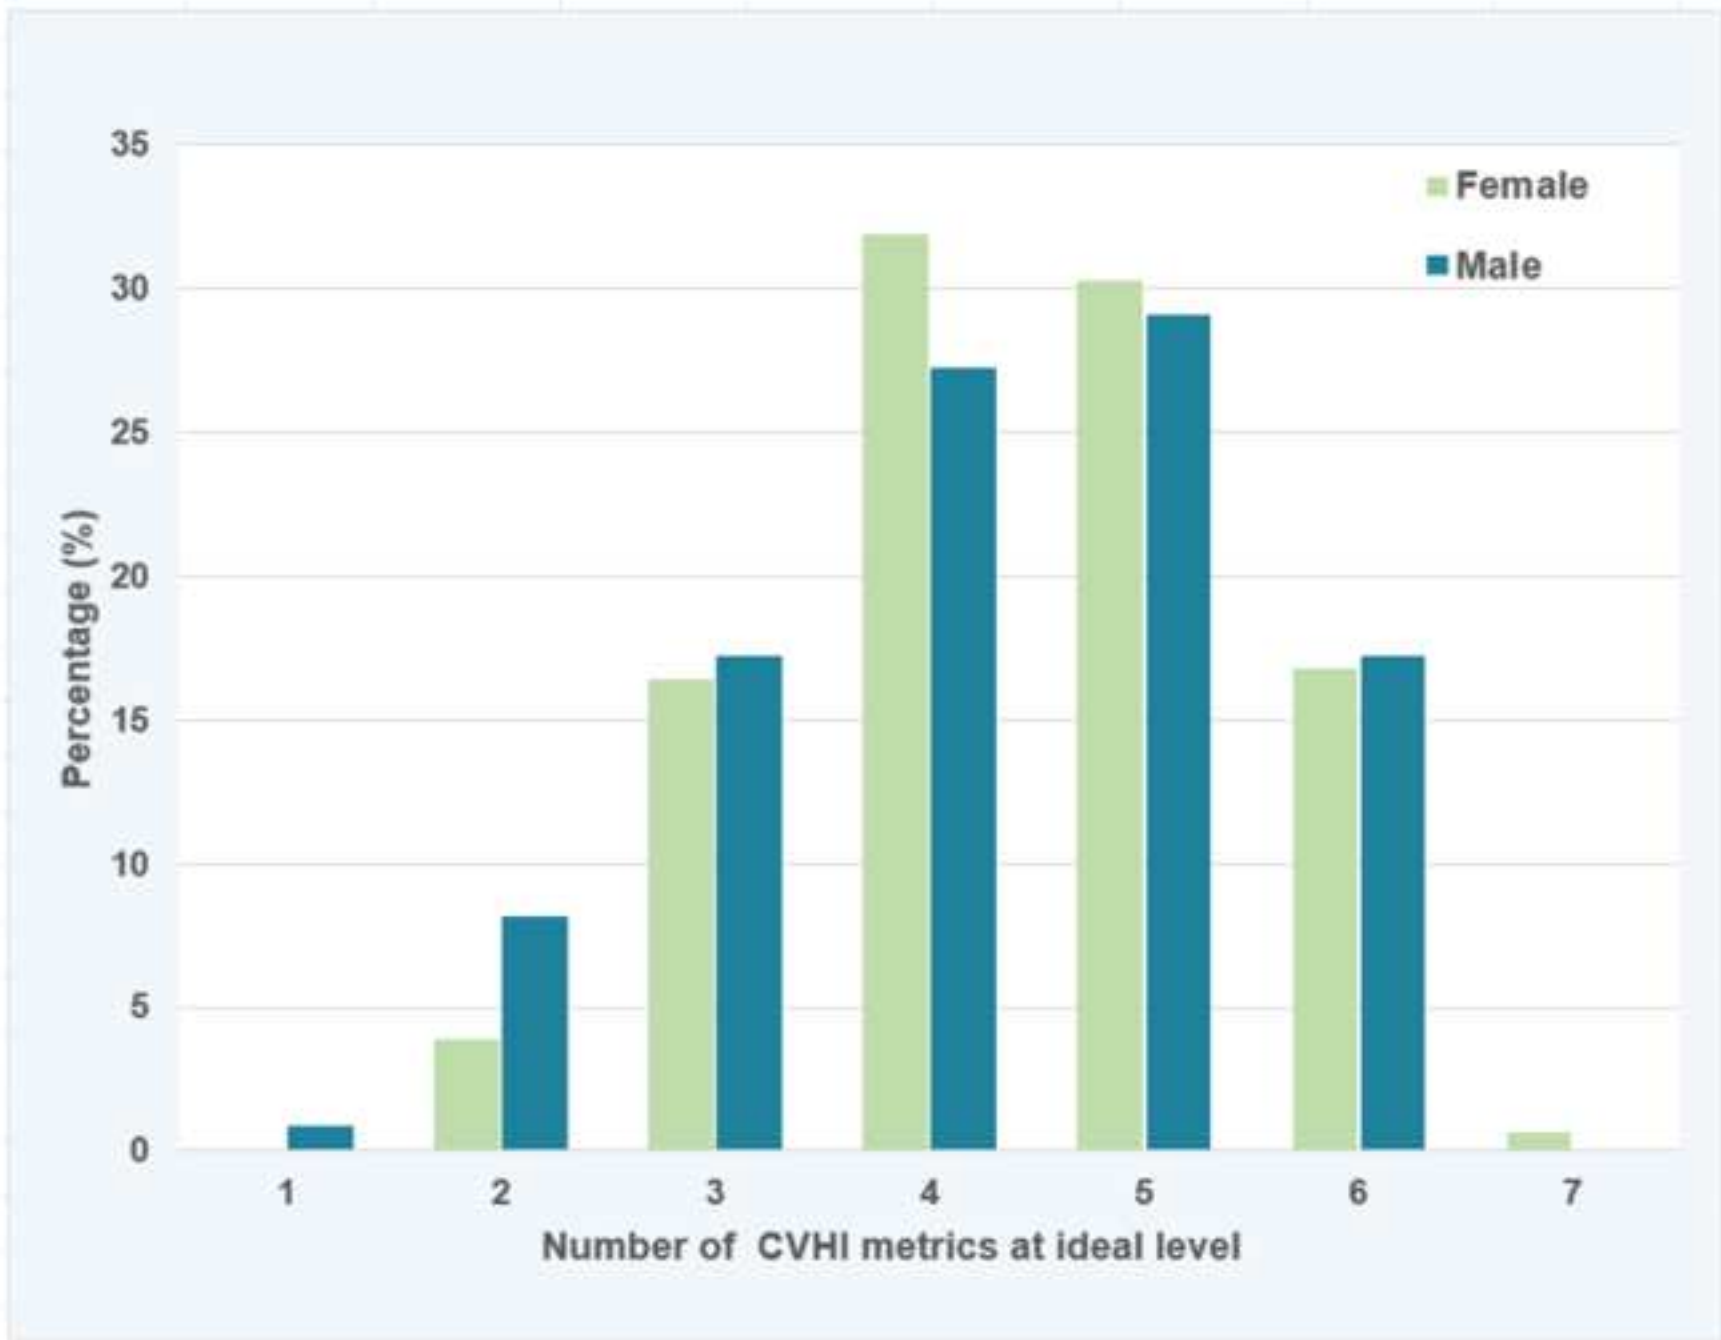

Figure 1: Distribution of the number of CVHI metrics at ideal level by sex
