# Supplementary material for: Ideal Cardiovascular Health: Distribution, Determinants and Relationship with Health Status among People Living with HIV in Urban Tanzania
Source: PubMed Central journal article supplement (PMC9562968; doi:10.5334/gh.1157), 2022-10-12
Supplement: gh-17-1-1157-s2.pdf [file gh-17-1-1157-s2.pdf]

**Ideal Cardiovascular Health: distribution, determinants and relationship with health status among people living with HIV in urban Tanzania**  
Supplementary material

Table 1: Results of bivariate and multivariable regression after multiple imputation

|                                                    | Bivariate models          |                  | Multivariable models      |                  |
|----------------------------------------------------|---------------------------|------------------|---------------------------|------------------|
|                                                    | COR (95% CI)              | p-value          | AOR (95% CI)              | p-value          |
| Age                                                | <b>0.98 (0.97 – 0.98)</b> | <b>&lt;0.001</b> | <b>0.97 (0.96 – 0.99)</b> | <b>&lt;0.001</b> |
| Sex                                                |                           |                  |                           |                  |
| Female                                             | Ref.                      |                  | -                         | -                |
| Male                                               | 0.79 (0.49 – 1.30)        | 0.35             |                           |                  |
| Level of education                                 |                           |                  |                           |                  |
| Primary education                                  | Ref.                      |                  | -                         | -                |
| Secondary education                                | 1.06 (0.95 – 1.81)        | 0.84             |                           |                  |
| Beyond secondary                                   | 0.83 (0.36 – 1.95)        | 0.68             |                           |                  |
| No school attended                                 | 0.81 (0.42 – 1.56)        | 0.52             |                           |                  |
| Occupation status                                  |                           |                  |                           |                  |
| Self-employed                                      | Ref.                      |                  | -                         | -                |
| Retired or unemployed                              | 0.76 (0.49 – 1.20)        | 0.25             |                           |                  |
| Employed                                           | 0.88 (0.65 – 1.21)        | 0.43             |                           |                  |
| Relationship status                                |                           |                  |                           |                  |
| Married/cohabiting                                 | Ref.                      |                  | -                         | -                |
| Single/never married                               | 1.17 (0.80 – 1.71)        | 0.41             |                           |                  |
| Widowed                                            | 0.92 (0.59 – 1.42)        | 0.70             |                           |                  |
| Insurance status                                   |                           |                  |                           |                  |
| No                                                 | Ref.                      |                  | Ref.                      |                  |
| Yes                                                | <b>0.68 (0.38 – 1.20)</b> | <b>0.18</b>      | 0.78 (0.40 – 1.53)        | 0.47             |
| ART regimen                                        |                           |                  |                           |                  |
| TDF+3TC+DTG (TLD)                                  | Ref.                      |                  | -                         | -                |
| Other                                              | 0.90 (0.56 – 1.44)        | 0.67             |                           |                  |
| HIV viral load                                     |                           |                  |                           |                  |
| ≤50                                                | Ref.                      |                  | -                         | -                |
| >50                                                | 1.02 (0.62 – 1.54)        | 0.92             |                           |                  |
| Years lived with HIV infection                     | 1.01 (0.99 – 1.04)        | 0.30             | -                         | -                |
| Duration on ART                                    | <b>1.21 (0.99 – 1.65)</b> | <b>0.22</b>      | 1.03 (0.99 – 1.06)        | 0.10             |
| Adherence to ART                                   |                           |                  |                           |                  |
| Good adherence                                     | Ref.                      |                  | -                         | -                |
| Poor adherence                                     | 1.15 (0.59 – 1.73)        | 0.96             |                           |                  |
| Alcohol use                                        |                           |                  |                           |                  |
| No                                                 | Ref.                      |                  | Ref.                      |                  |
| Yes                                                | <b>0.50 (0.32 – 0.79)</b> | <b>0.003</b>     | <b>0.46 (0.30 – 0.73)</b> | <b>0.001</b>     |
| Presence of comorbidities                          |                           |                  |                           |                  |
| No                                                 | Ref.                      |                  | Ref.                      |                  |
| Yes                                                | <b>0.74 (0.50 – 1.12)</b> | <b>0.15</b>      | 0.82 (0.55 – 1.22)        | 0.31             |
| Medication use (HTN, diabetes, dyslipidemia) (n,%) |                           |                  |                           |                  |
| No                                                 | Ref.                      |                  |                           |                  |
| Yes                                                | 0.84 (0.42 – 1.70)        | 0.62             |                           |                  |
| Lifestyle modification (n,%)                       |                           |                  |                           |                  |
| No                                                 | Ref.                      |                  | -                         | -                |
| Yes                                                | 0.95 (0.67 -0.74)         | 0.77             |                           |                  |
| Family history of CVD (n,%)                        |                           |                  |                           |                  |
| No                                                 | Ref.                      |                  | -                         | -                |
| Yes                                                | 1.04 (0.68 – 1.61)        | 0.85             |                           |                  |

Table 2: Association between CVHI score and self-reported health status

|                                                                                      | Coefficient (95% CI) | p-value |
|--------------------------------------------------------------------------------------|----------------------|---------|
| Model 1: Unadjusted model                                                            | 0.02 (-0.47 – 0.51)  | 0.91    |
| Model 2: Adjusted for socio-demographic characteristics                              | -0.03 (-0.05 – 0.03) | 0.92    |
| Model 3: Adjusted for insurance status and alcohol use                               | -0.12 (-0.81 – 0.57) | 0.67    |
| Model 4: Adjusted for other comorbidities, medication use and lifestyle modification | -0.17 (-0.88 – 0.54) | 0.57    |

Table 3: Association between CVHI score and health status after multiple imputation of the CVHi score

|                                                                                      | Coefficient (95% CI)  | p-value |
|--------------------------------------------------------------------------------------|-----------------------|---------|
| Model 1: Unadjusted model                                                            | -0.09 (-0.39 – 0.22)  | 0.49    |
| Model 2: Adjusted for socio-demographic characteristics                              | 0.001 (-0.20 – 0.21)  | 0.99    |
| Model 3: Adjusted for insurance status and alcohol use                               | -0.006 (-0.17 – 0.16) | 0.93    |
| Model 4: Adjusted for other comorbidities, medication use and lifestyle modification | -0.02 (-0.20 – 0.15)  | 0.75    |
